# Supplementary material
Source: Springer Nature journal article supplement (https://www.springermedizin.de/resource/supplementary/12885_2008_1566_MOESM3_ESM.pdf/9472338)

Normal keratinocyte

T·Tn

#1  
N T

#2  
N T

#3  
N T

#4  
N T

#5  
N T

#6  
N T

#7  
N T

#8  
N T

#9  
N T

#10  
N T

MKRN1

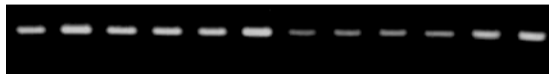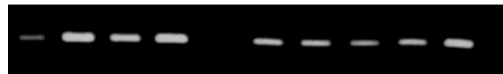

$\beta$ -actin

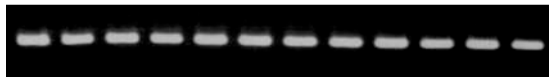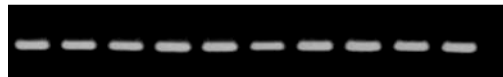

Supplement: MOESM3 [file 9472338]
